# Supplementary material for: Efficiency boosting in Sb2(S,Se)3 solar cells enabled by tailoring bandgap gradient via a hybrid growth method
Source: Royal Society of Chemistry journal article supplement (doi:10.1039/d3ta05489f), 2023-01-01
Supplement: d3ta05489f1.pdf [file d3ta05489f1.pdf]

## Supporting Information

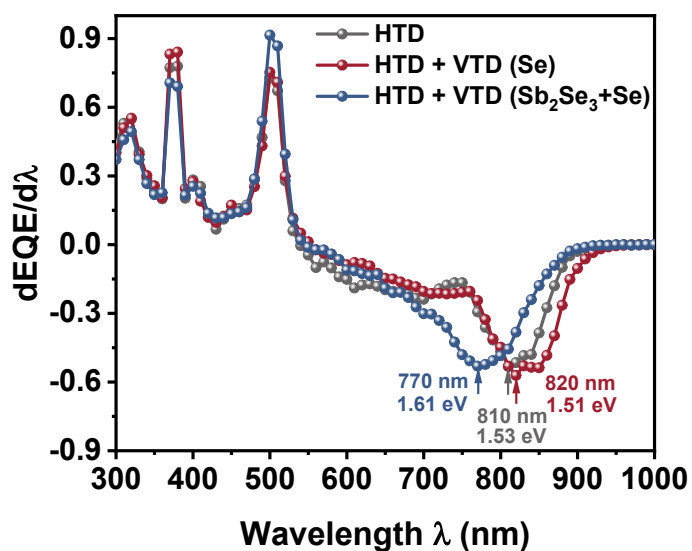

**Fig. S1** Bandgaps of  $Sb_2(S,Se)_3$  films determined using the peak position of the first-order derivative of the EQE curves.

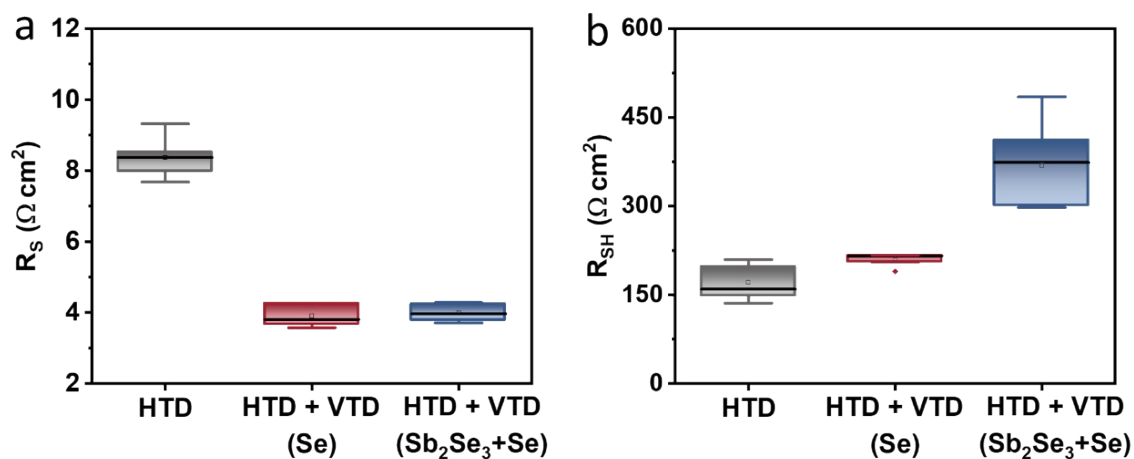

**Fig. S2** Statistical box plots of (a)  $R_S$  and (b)  $R_{SH}$  in HTD, HTD + VTD (Se), and HTD + VTD ( $Sb_2Se_3+Se$ ) devices.

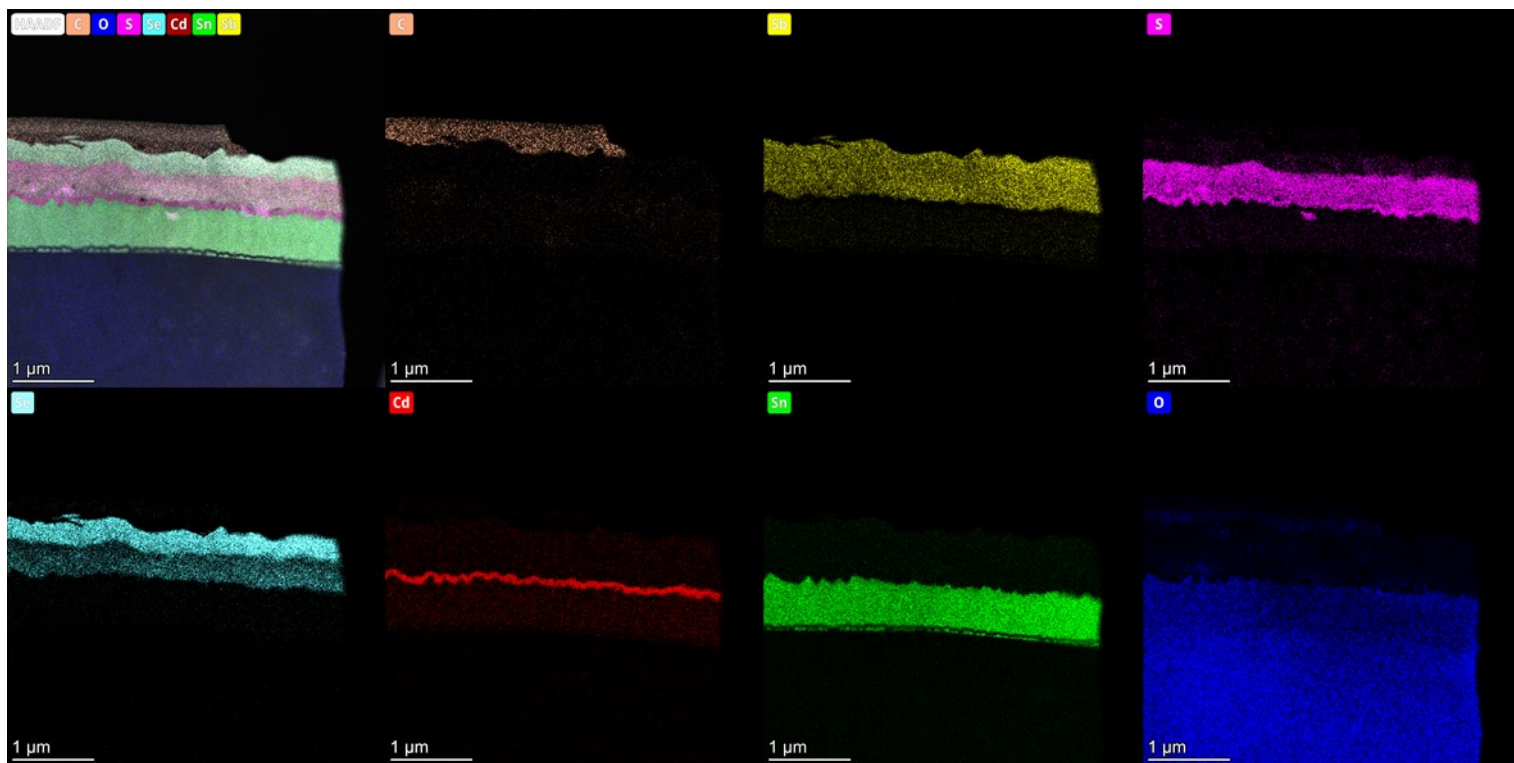

**Fig. S3** STEM EDS mapping of HTD + VTD ( $\text{Sb}_2\text{Se}_3+\text{Se}$ ) thin film.

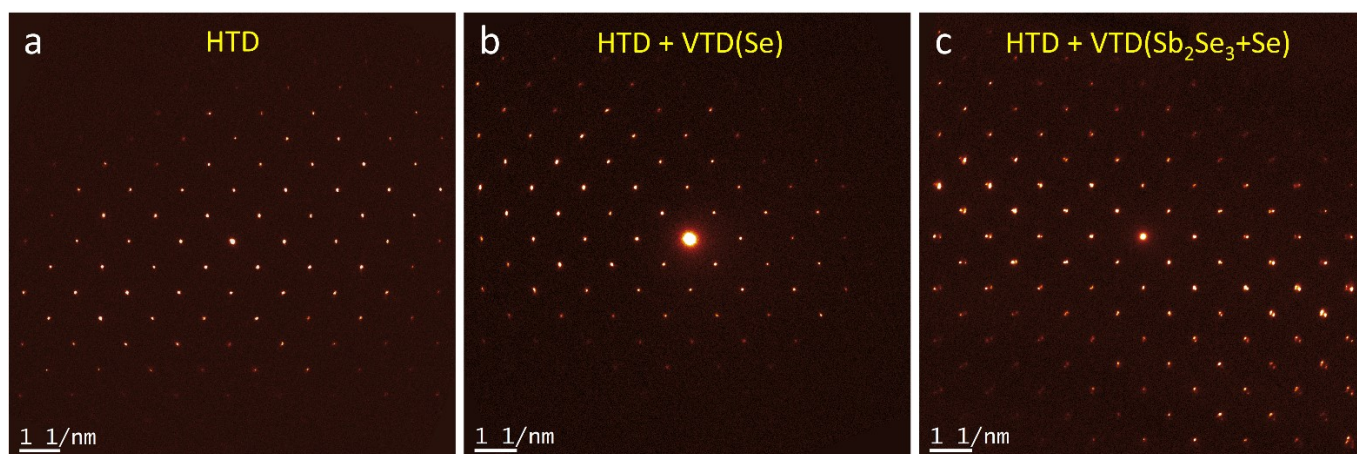

**Fig. S4** SAD patterns  $\text{Sb}_2(\text{S,Se})_3$  films fabricated by (a) HTD only, (b) HTD + VTD (Se), and (c) HTD + VTD ( $\text{Sb}_2\text{Se}_3+\text{Se}$ ). Please note that HTD only and HTD + VTD (Se) show a single array of diffraction spots with slightly different lattice parameters, while HTD + VTD ( $\text{Sb}_2\text{Se}_3+\text{Se}$ ) exhibits well distinguished splits of diffraction spots.

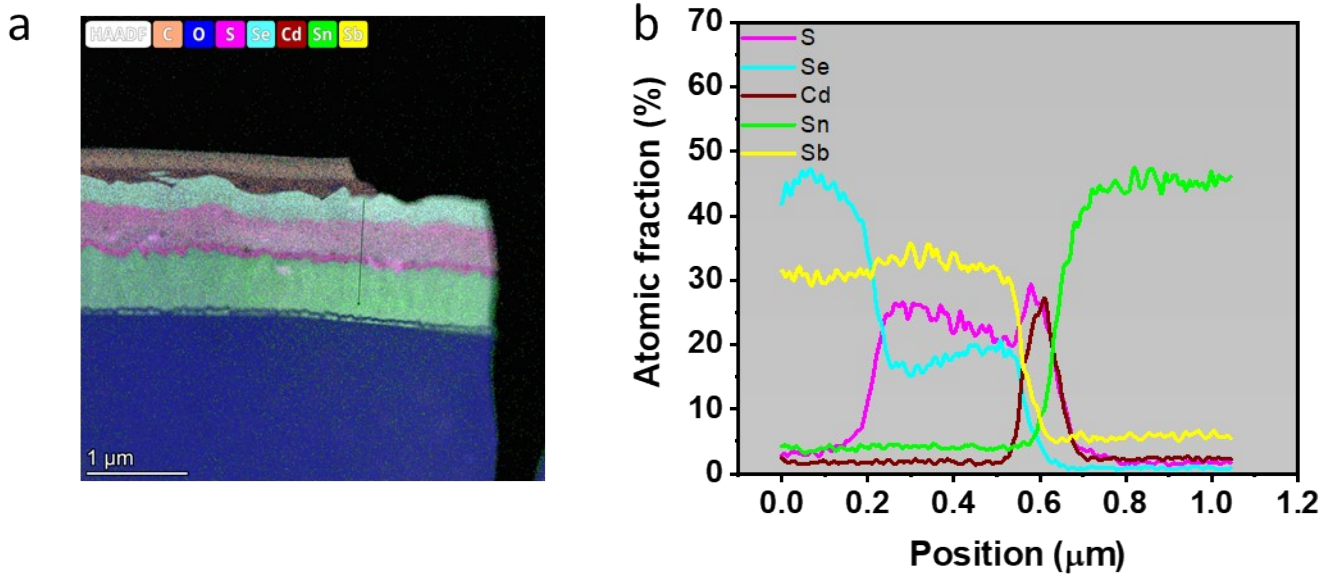

**Fig. S5** (a) STEM cross-sectional image with EDS mapping and (b) In-depth atomic fraction of HTD + VTD ( $\text{Sb}_2\text{Se}_3+\text{Se}$ ) thin film.

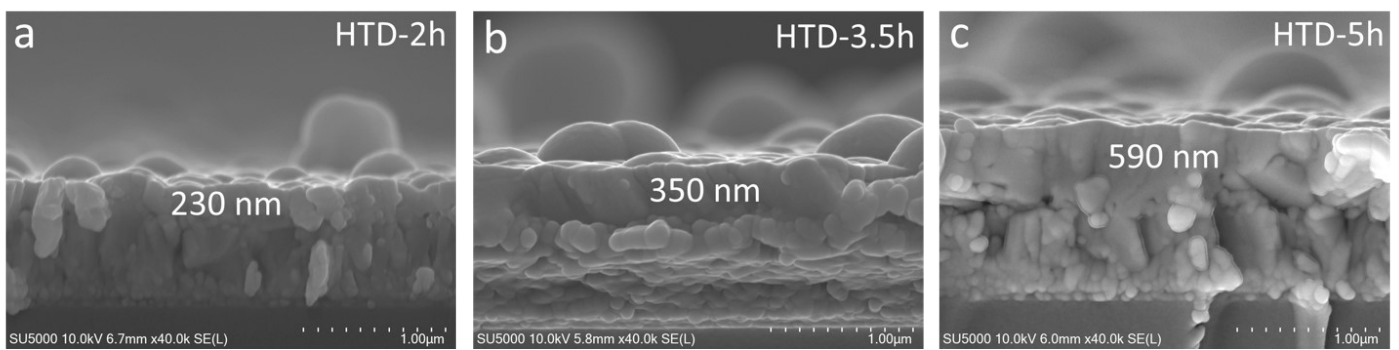

**Fig. S6** Cross-sectional SEM images of  $\text{Sb}_2(\text{S,Se})_3$  films undergoing hydrothermal deposition (HTD) for: (a) 2 h, (b) 3.5 h, and (c) 5 h. 3.5 h is the optimal deposition duration leading to the champion device.

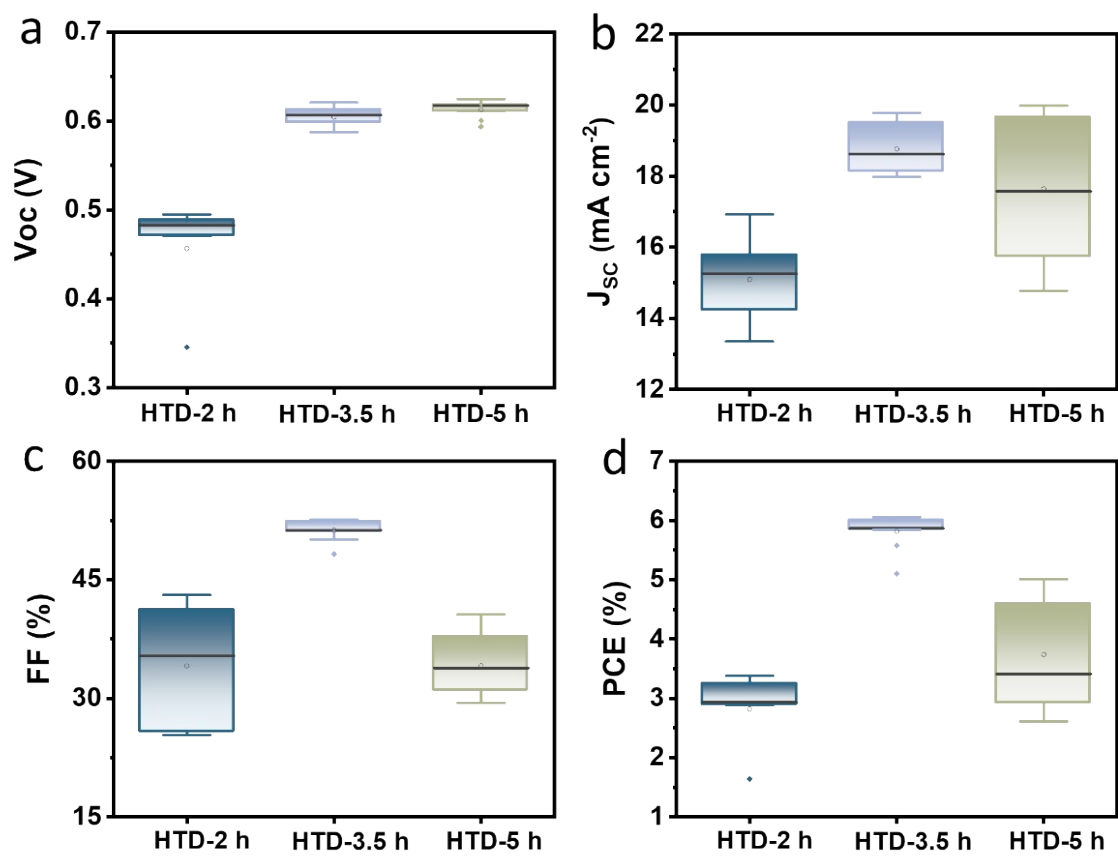

**Fig. S7** Photovoltaic performance of  $\text{Sb}_2(\text{S,Se})_3$  solar cells fabricated by hydrothermal deposition method for 2 h, 3.5 h, and 5 h: Statistical box plots of (a)  $V_{oc}$ , (b)  $FF$ , (c)  $J_{sc}$ , and (d) PCE. 3.5 h is the optimal deposition duration leading to the champion device.

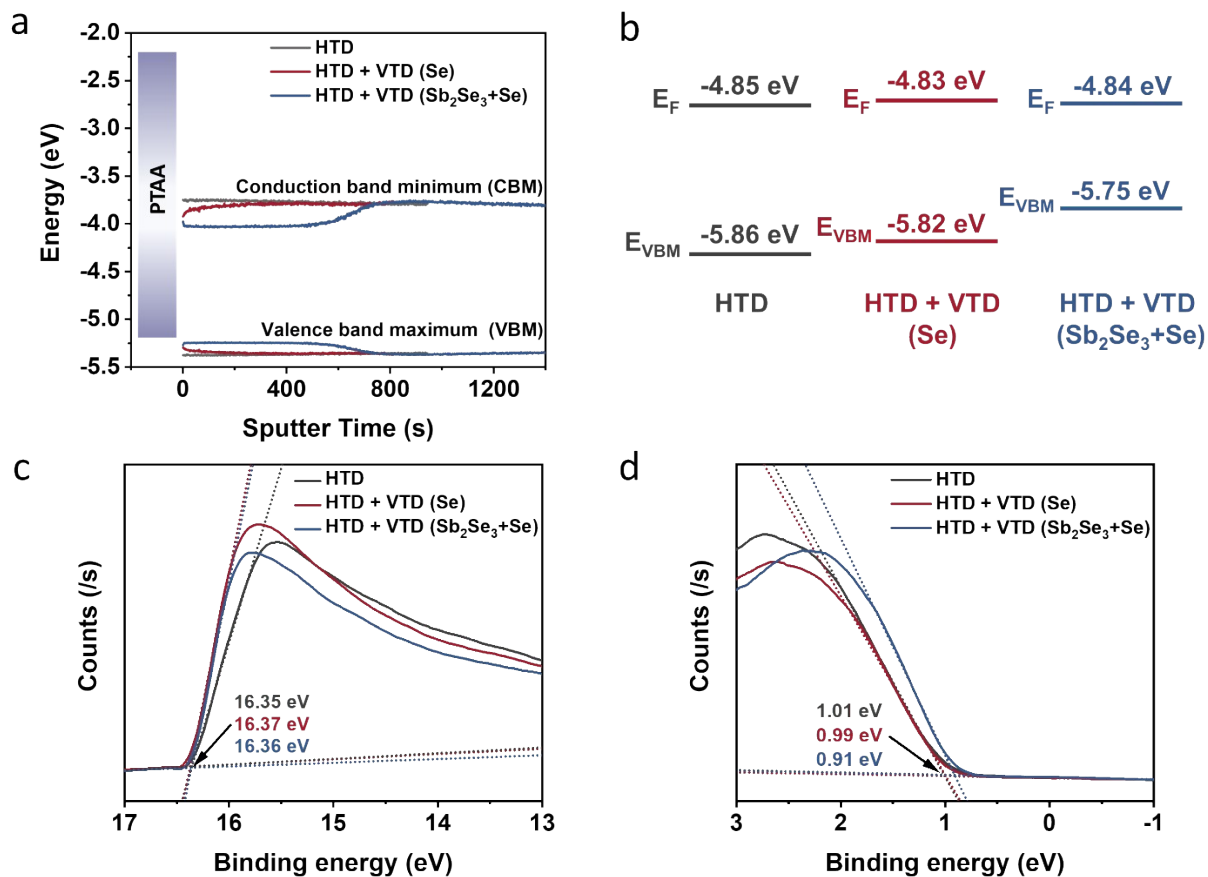

**Fig. S8** (a) Energy level positions constructed from literature values,<sup>39</sup> (b) Valence band maximum positions measured from UPS, (c) Secondary cut-off regions, and (d) valence band regions of UPS spectra.
